# Supplementary material
Source: HighWire-hosted journal article supplement (https://erj.ersjournals.com/content/61/2/2102269)

**Supplementary files**

**SUPPLEMENTARY TABLE S1.** Formulae to calculate the average of fibrosis grade points for each level and for all three levels

|                                         |            | <b>Fibrosis<br/>grade for<br/>upper level</b> | <b>Fibrosis<br/>grade for<br/>middle level</b> | <b>Fibrosis<br/>grade for<br/>lower level</b> |
|-----------------------------------------|------------|-----------------------------------------------|------------------------------------------------|-----------------------------------------------|
| <b>Interpreted by<br/>radiologist</b>   | Right lung | a                                             | b                                              | c                                             |
|                                         | Left lung  | d                                             | e                                              | f                                             |
| <b>Interpreted by<br/>pulmonologist</b> | Right lung | g                                             | h                                              | i                                             |
|                                         | Left lung  | j                                             | k                                              | l                                             |
| Average points<br>for each level        |            | $(a+d+g+j)/4$                                 | $(b+e+h+k)/4$                                  | $(c+f+i+l)/4$                                 |
| Average points<br>for three levels      |            | $(a+b+c+d+e+f+g+h+i+j+k+l)/12$                |                                                |                                               |

Grade points were allocated as follows: grade 0, 0%; grade 1, >0%–10%; grade 2, >10%–25%; grade 3, >25%–50%; grade 4, >50% of the fibrosis-occupied area.

**SUPPLEMENTARY TABLE S2.** Number of patients with other lung diseases included in the first dataset as part of the control dataset (disease control images) according to disease and learning or testing dataset inclusion

|                                           | Learning dataset          | Testing dataset |
|-------------------------------------------|---------------------------|-----------------|
|                                           | No. patients <sup>#</sup> |                 |
| Control                                   | 79                        | 17              |
| Lung cancer                               | 33 <sup>¶</sup>           | 6               |
| Pulmonary non-tuberculous mycobacteriosis | 7                         | 3               |
| Sarcoidosis (without lung fibrosis)       | 5                         | 3               |
| COPD (with pulmonary emphysema)           | 7 <sup>+</sup>            | 1               |
| Lung nodule                               | 3                         | 1               |
| Pulmonary arteriovenous malformation      | 1                         | 1               |
| Bronchiectasis                            | 2                         | 0               |
| Pleural plaque                            | 1                         | 0               |
| Pulmonary aspergilloma                    | 0                         | 1               |
| Pulmonary lymphangioliomyomatosis         | 1                         | 0               |
| Pulmonary tuberculosis                    | 1                         | 0               |
| Allergic bronchopulmonary                 | 1 <sup>§</sup>            | 0               |

---

|                      |                                |   |
|----------------------|--------------------------------|---|
| aspergillosis        |                                |   |
| No abnormal findings | 20                             | 1 |
| Bronchial asthma     | 17 <sup>¶</sup> + <sup>§</sup> | 1 |
| Cough variant asthma | 3                              | 0 |

---

COPD, chronic obstructive pulmonary disease; CR, chest radiography.

#The control dataset included one CR from each patient. <sup>¶</sup>Lung cancer and bronchial asthma overlapped in one patient. <sup>+</sup>COPD and bronchial asthma overlapped in one patient. <sup>§</sup>Allergic bronchopulmonary aspergillosis and bronchial asthma overlapped in one patient.

**SUPPLEMENTARY TABLE S3.** Number of CT images according to the average of fibrosis grade points ( $\leq 1$ ,  $>1-2$ ,  $>2-3$ ,  $>3$ ) for each level and for the three levels combined.

| <b>Average of<br/>grade points</b> | <b><math>\leq 1</math></b> | <b><math>&gt;1-2</math></b> | <b><math>&gt;2-3</math></b> | <b><math>&gt;3</math></b> |
|------------------------------------|----------------------------|-----------------------------|-----------------------------|---------------------------|
| Upper level                        | 284                        | 61                          | 14                          | 8                         |
| Middle level                       | 240                        | 83                          | 31                          | 13                        |
| Lower level                        | 135                        | 121                         | 56                          | 55                        |
| Three levels                       | 186                        | 127                         | 46                          | 8                         |

**SUPPLEMENTARY FIGURE S1.** Flow chart of chest radiographs included in the first dataset (includes the learning dataset and the testing dataset).

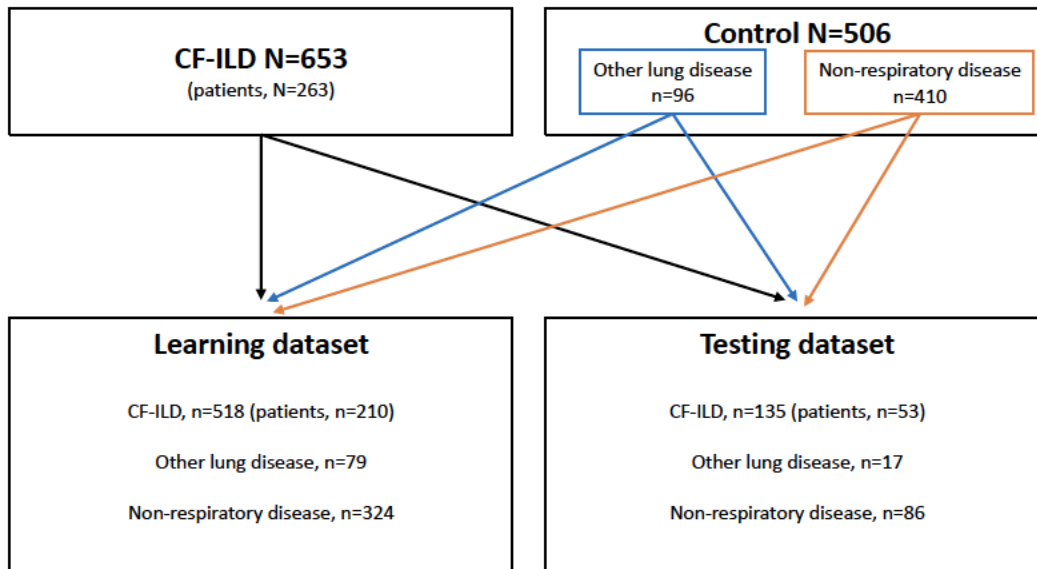

**SUPPLEMENTARY FIGURE S2.** Example CT images for each of the five grades (grade 0, 0%; grade 1, >0%–10%; grade 2, >10%–25%; grade 3, >25%–50%; grade 4, >50% of the fibrosis-occupied lung area) from patients with chronic fibrosing interstitial lung disease-suspected/ diagnosed in the second dataset.

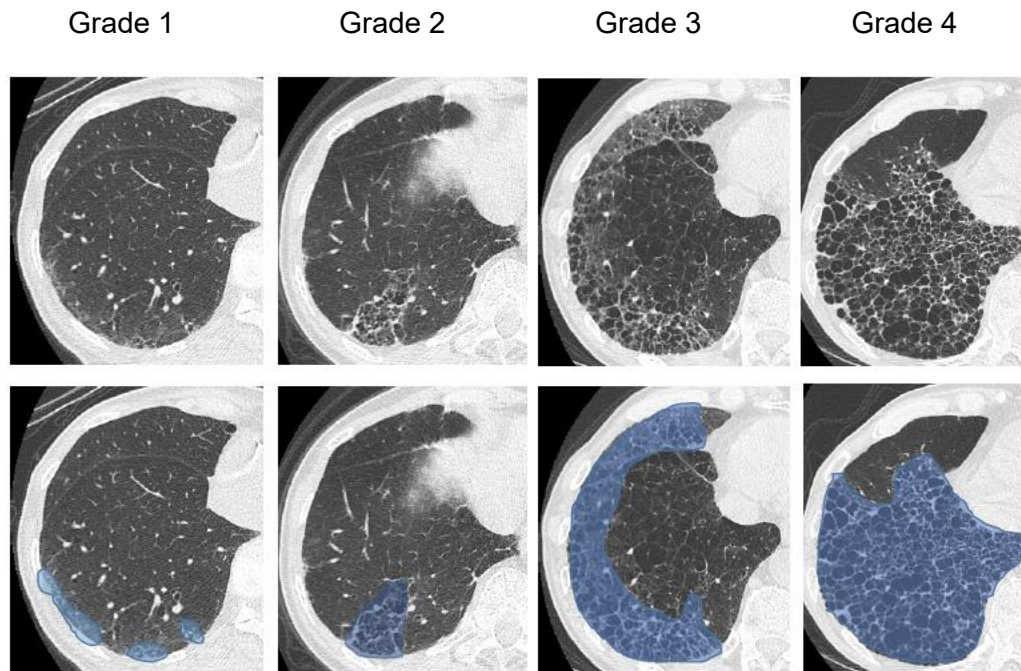

Supplement: inline-supplementary-material-1 [file inline-supplementary-material-1.pdf]
